# Supplementary material
Source: PubMed Central journal article supplement (PMC8919986)

## **Supplemental Material**

### **Supplemental Methods**

#### **Electrical stimulation of CX-G3-labeled hippocampal neurons**

Following 5 min incubation in 0.5  $\mu$ M CX-G3 and washes, 18-20 DIV neurons were imaged in normal Tyrodes solution in a custom-built imaging chamber as described previously. Images were acquired every 5 seconds over a 5 min timecourse, under baseline conditions or in the presence of electrical stimulation (10Hz, 60 seconds; 10 mA current, 1 msec pulse width), administered following the first 3 images (15 sec into timecourse). To calculate the change in CX-G3 fluorescence intensity over time, we used the Time Series Analyzer V 2.0 plugin (Balaji) in Image J. Fluorescence intensity for each punctum at any given time 't' ( $F_t$ ) was expressed as a fraction of its starting fluorescence ( $F_0$ ) using the equation:  $(F_t - F_0)/F_0$ . These values were averaged for all puncta in a field of view and normalized to the peak fluorescence intensity, making '1' the highest value.

#### **Triton X-100 extraction**

For 18-20 DIV hippocampal neurons labeled with CX-G3 and imaged in Tyrodes solution, images were acquired before and after application of 0.01% Triton X-100.

#### **CX-G3 labeling in astrocyte cultures**

Astrocytes were prepared as previously described<sup>1</sup>, plated into 96-well plates coated with poly-L-lysine, and imaged after 1 week in culture. Prior to imaging, cells were incubated with 2  $\mu$ M CX-G3 and 5  $\mu$ M Calcein AM (Thermofisher) for visualization.

**Tables****Table S1.** Colocalization of GFP-Syn and mCh-Rab3 with synaptic and non-synaptic markers.

| <b>Marker protein</b>                    | <b>Fraction colocalization with<br/>GFP-Syn<br/>(avg +/- STD)</b> | <b>Fraction colocalization with<br/>mCh-Rab3<br/>(avg +/- STD)</b> |
|------------------------------------------|-------------------------------------------------------------------|--------------------------------------------------------------------|
| <b>MAP2</b><br>(cell body/dendrite)      | <b>0.158</b><br>+/- 0.03                                          | <b>0.194</b><br>+/- 0.01                                           |
| <b>LAMP1</b><br>(lysosome)               | <b>0.119</b><br>+/- 0.06                                          | <b>0.126</b><br>+/- 0.02                                           |
| <b>SV2</b><br>(synaptic)                 | <b>0.595</b><br>+/- 0.12                                          | --                                                                 |
| <b>VGLUT1</b><br>(synaptic)              | <b>0.607</b><br>+/- 0.17                                          | --                                                                 |
| <b>Synaptophysin</b><br>(synaptic)       | --                                                                | <b>0.649</b><br>+/- 0.08                                           |
| <b>Synapsin</b><br>(synaptic)            | --                                                                | <b>0.834</b><br>+/- 0.07                                           |
| <b>GFP</b><br>(control for GFP-Syn)      | <b>1.05</b><br>+/- 0.11                                           | --                                                                 |
| <b>mCherry</b><br>(control for mCh-Rab3) | --                                                                | <b>0.876</b><br>+/- 0.12                                           |

**Table S2.** Organization of fluorescent dyes into groups, based on excitation/emission wavelength, for high-throughput screening

| <b>Filter combination</b> | <b>Number of compounds</b> | <b>Number of 96wells plates</b> | <b>Synaptic marker used</b> |
|---------------------------|----------------------------|---------------------------------|-----------------------------|
| <b>CFP:YFP</b>            | 503                        | 6                               | <b>mCherry-Rab3</b>         |
| <b>DAPI:Cy3</b>           | 80                         | 1                               | <b>mCherry-Rab3</b>         |
| <b>DAPI:FITC</b>          | 961                        | 12                              | <b>mCherry-Rab3</b>         |
| <b>FITC:Cy3</b>           | 669                        | 8                               | <b>mCherry-Rab3</b>         |
| <b>FITC:FITC</b>          | 633                        | 8                               | <b>mCherry-Rab3</b>         |
| <b>FITC:YFP</b>           | 831                        | 10                              | <b>mCherry-Rab3</b>         |
| <b>YFP:YFP</b>            | 38                         | 1                               | <b>mCherry-Rab3</b>         |
| <b>CFP:Cy3</b>            | 324                        | 4                               | <b>GFP-Synapsin</b>         |
| <b>Cy3:Cy3</b>            | 311                        | 4                               | <b>GFP-Synapsin</b>         |
| <b>Cy5:Cy3</b>            | 31                         | 1                               | <b>GFP-Synapsin</b>         |
| <b>DAPI:CFP</b>           | 401                        | 5                               | <b>GFP-Synapsin</b>         |
| <b>DAPI:DAPI</b>          | 401                        | 5                               | <b>GFP-Synapsin</b>         |
| <b>dsRed:dsRed</b>        | 968                        | 12                              | <b>GFP-Synapsin</b>         |
| <b>FITC:TexasRed</b>      | 82                         | 1                               | <b>GFP-Synapsin</b>         |
| <b>TexasRed:Cy5</b>       | 94                         | 2                               | <b>GFP-Synapsin</b>         |
| <b>TexasRed:TexasRed</b>  | 665                        | 9                               | <b>GFP-Synapsin</b>         |

**Table S3.** List of hit compounds from each group, with group average mean colocalization and hit threshold (\*\* = groups that exhibited significant bleedthrough into synaptic marker channel)

| Filter combination        | Mean colocalization with synaptic marker | Hit threshold (StdDev >2.5) | Number of hits (StdDev >2.5) |
|---------------------------|------------------------------------------|-----------------------------|------------------------------|
| <b>FITC: Cy3**</b>        | 33.8 %                                   | 86.8 %                      | 4                            |
| <b>Cy3: Cy3**</b>         | 29 %                                     | 73.0 %                      | 2                            |
| <b>dsRed: dsRed</b>       | 24.9 %                                   | 67.4 %                      | -                            |
| <b>CFP: Cy3**</b>         | 14.5 %                                   | 63.5 %                      | 4                            |
| <b>TexasRed: TexasRed</b> | 24.7 %                                   | 62.2 %                      | 1                            |
| <b>FITC: YFP **</b>       | 18.6 %                                   | 59.6 %                      | 3                            |
| <b>Cy5: Cy3</b>           | 25.5 %                                   | 58.7 %                      | -                            |
| <b>FITC: FITC</b>         | 15.3 %                                   | 56.2 %                      | -                            |
| <b>TexasRed: Cy5</b>      | 27.4 %                                   | 56.2 %                      | -                            |
| <b>YFP: YFP</b>           | 16.2 %                                   | 52.6 %                      | -                            |
| <b>DAPI: FITC</b>         | 12.4 %                                   | 49.8 %                      | 1                            |
| <b>CFP: YFP **</b>        | 13.9 %                                   | 47.9 %                      | 3                            |
| <b>DAPI: Cy3</b>          | 13.3 %                                   | 44.6 %                      | 3                            |
| <b>DAPI: CFP</b>          | 8.6 %                                    | 27.8 %                      | 8                            |
| <b>FITC: TexasRed</b>     | 3.1 %                                    | 25.8 %                      | 2                            |
| <b>DAPI: DAPI</b>         | 4.1 %                                    | 25.1 %                      | 22                           |

**Table S4.** Colocalization of CX compounds with GFP-Synapsin, arranged from highest to lowest average fraction colocalization, for 3 experiments

| Compound Name | Expt. 1     | Expt. 2     | Expt. 3     | Average colocalization | STDEV       |
|---------------|-------------|-------------|-------------|------------------------|-------------|
| CX-G3         | 0.400091624 | 0.35887369  | 0.330652323 | 0.363205879            | 0.03492177  |
| CX-D10        | 0.332167577 | 0.37816616  | 0.371329948 | 0.360554562            | 0.024820337 |
| CX-D5         | 0.344172452 | 0.368942561 | 0.348666409 | 0.353927141            | 0.013196441 |
| CX-A6         | 0.347260702 | 0.336724169 | 0.36113565  | 0.348373507            | 0.012243727 |
| CX-E3         | 0.383308985 | 0.372455505 | 0.273921309 | 0.3432286              | 0.060266698 |
| CX-E6         | 0.362289168 | 0.332792115 | 0.305939387 | 0.333673557            | 0.028185229 |
| CX-A4         | 0.340068341 | 0.337636462 | 0.292401054 | 0.323368619            | 0.026846249 |
| CX-A8         | 0.295907985 | 0.336455464 | 0.334761601 | 0.322375017            | 0.022936763 |

|        |             |             |             |             |             |
|--------|-------------|-------------|-------------|-------------|-------------|
| CX-B9  | 0.329788244 | 0.325802873 | 0.3001188   | 0.318569972 | 0.016102954 |
| CX-B11 | 0.308280392 | 0.321880349 | 0.262925852 | 0.297695531 | 0.030869688 |
| CX-F8  | 0.262217893 | 0.316582542 | 0.305546188 | 0.294782208 | 0.028736322 |
| CX-D6  | 0.269480519 | 0.329993605 | 0.274290557 | 0.291254894 | 0.033634802 |
| CX-D11 | 0.293083573 | 0.306454272 | 0.260283092 | 0.286606979 | 0.023757192 |
| CX-D8  | 0.301872752 | 0.316968915 | 0.240726589 | 0.286522752 | 0.040372515 |
| CX-E5  | 0.305103931 | 0.311484305 | 0.24026863  | 0.285618955 | 0.039403887 |
| CX-C4  | 0.313543381 | 0.287095336 | 0.228452656 | 0.276363791 | 0.043548621 |
| CX-E2  | 0.286845579 | 0.298420294 | 0.238445724 | 0.274570532 | 0.031815795 |
| CX-G6  | 0.30675619  | 0.271348448 | 0.235994699 | 0.271366446 | 0.035380749 |
| CX-C7  | 0.20177268  | 0.372809228 | 0.237732815 | 0.270771574 | 0.090177852 |
| CX-A2  | 0.227790815 | 0.290228977 | 0.287364352 | 0.268461381 | 0.035250855 |
| CX-A7  | 0.272355541 | 0.268108062 | 0.26480874  | 0.268424114 | 0.003783314 |
| CX-G4  | 0.261982186 | 0.284447917 | 0.254360214 | 0.266930106 | 0.015642215 |
| CX-E4  | 0.276600955 | 0.248416548 | 0.256436267 | 0.26048459  | 0.014521773 |
| CX-D2  | 0.249287536 | 0.267239046 | 0.25713439  | 0.257886991 | 0.008999388 |
| CX-A11 | 0.169431759 | 0.271175391 | 0.30620577  | 0.24893764  | 0.071046961 |
| CX-C11 | 0.273662551 | 0.238315238 | 0.207543925 | 0.239840571 | 0.033085694 |
| CX-B10 | 0.223882839 | 0.229948854 | 0.201726488 | 0.218519394 | 0.014855989 |
| CX-A5  | 0.211844031 | 0.213865977 | 0.226887948 | 0.217532652 | 0.008164756 |
| CX-C3  | 0.244762514 | 0.228802685 | 0.156312577 | 0.209959259 | 0.047139727 |
| CX-D4  | 0.211501597 | 0.201562449 | 0.212182162 | 0.208415403 | 0.005944579 |
| CX-B7  | 0.209573514 | 0.214468881 | 0.196198235 | 0.206746877 | 0.009457618 |
| CX-E9  | 0.168491891 | 0.257078524 | 0.187798049 | 0.204456155 | 0.046583444 |
| CX-H3  | 0.222857143 | 0.26364841  | 0.125556955 | 0.204020836 | 0.070946581 |
| CX-B4  | 0.219330105 | 0.224126635 | 0.150895296 | 0.198117345 | 0.040965756 |
| CX-B5  | 0.197003478 | 0.204168032 | 0.175157252 | 0.192109587 | 0.015111882 |
| CX-C6  | 0.197344322 | 0.194346674 | 0.172707889 | 0.188132962 | 0.013442326 |
| CX-B8  | 0.191304348 | 0.206979475 | 0.147796589 | 0.182026804 | 0.030662813 |
| CX-H2  | 0.235697607 | 0.240964139 | 0.032258065 | 0.169639937 | 0.119005329 |
| CX-B2  | 0.159160789 | 0.187548905 | 0.122838106 | 0.156515933 | 0.032436373 |
| CX-H6  | 0.1697385   | 0.191867759 | 0.107667043 | 0.156424434 | 0.043650755 |
| CX-C5  | 0.137692839 | 0.199177768 | 0.125581321 | 0.154150643 | 0.039462054 |
| CX-C2  | 0.138428918 | 0.174863828 | 0.128513383 | 0.14726871  | 0.024406912 |
| CX-A10 | 0.19108663  | 0.13199922  | 0.112741396 | 0.145275749 | 0.040825159 |
| CX-B6  | 0.148930154 | 0.177660302 | 0.10101998  | 0.142536812 | 0.038718095 |
| CX-A3  | 0.108695652 | 0.141789647 | 0.131479897 | 0.127321732 | 0.016934311 |
| CX-H11 | 0.132135704 | 0.130083251 | 0.094606049 | 0.118941668 | 0.021100235 |
| CX-F5  | 0.126860088 | 0.119274363 | 0.107762467 | 0.117965639 | 0.009615839 |
| CX-G11 | 0.120705475 | 0.13121043  | 0.084410093 | 0.112108666 | 0.024555992 |
| CX-H10 | 0.122125095 | 0.120981777 | 0.083070518 | 0.108725797 | 0.022225476 |
| CX-C9  | 0.087229331 | 0.108337436 | 0.10485418  | 0.100140316 | 0.011316069 |
| CX-C8  | 0.091809267 | 0.110867474 | 0.088861468 | 0.097179403 | 0.011945495 |

|        |             |             |             |             |             |
|--------|-------------|-------------|-------------|-------------|-------------|
| CX-F4  | 0.096732673 | 0.09429083  | 0.095372796 | 0.095465433 | 0.001223554 |
| CX-B3  | 0.119477588 | 0.089790455 | 0.053502544 | 0.087590196 | 0.03304251  |
| CX-G9  | 0.088948606 | 0.103500863 | 0.03922309  | 0.077224186 | 0.033704666 |
| CX-D7  | 0.069134292 | 0.091011942 | 0.058659218 | 0.072935151 | 0.016507864 |
| CX-G10 | 0.074237856 | 0.070176239 | 0.022324578 | 0.055579558 | 0.02887117  |

### Figure S1: CX compound lipophilicity vs. number of puncta

A) Heat map of Q4 plate, showing side chain structures of CX xanthone compounds. Darker color corresponds to higher number of puncta that colocalize with GFP-Syn . B) Plot of xanthone compound side chain calculated lipophilicity (LogP) vs. number of puncta that colocalize with GFP-Syn. CX-G3 and other compounds with high colocalization are highlighted in red. Note that the side chain of CX-G3 has a LogP value of 3.27. C) Graph of LysoTracker colocalization with GFP-Synapsin (fraction of LysoTracker puncta containing GFP signal). Colocalization of LysoTracker with GFP-Synapsin in randomized images (depicted with \*) are included for comparison (n=12 images acquired from two independent batches of neurons).

### Figure S2: Properties of CX-G3 labeling in neurons

A) Images of CX-G3 in hippocampal neurons at t=5 sec (1<sup>st</sup> image) and t=5 min (60<sup>th</sup> image), from a 5-minute timecourse in which images were acquired every 5 sec and neurons were not subject to electrical stimulation (control condition), in contrast to panels C and D. Size bar is 10  $\mu$ m. B) Quantification of normalized CX-G3 fluorescence intensity over time in this image series (see Supplemental Methods for details of analysis). Red arrows indicate t=5 sec and t=5 min. No photobleaching is observed; CX-G3 fluorescence actually increases slightly over the timecourse as indicated on the graph. Similar results were obtained for 4 fields of view, each from a different coverslip. C-D) Similar to A and B, but for a timecourse in which neurons were electrically stimulated (10Hz, 1 min; red bar in D) to induce synaptic vesicle recycling. Very little change in fluorescence intensity was observed during or after stimulation. Similar results were obtained from 4 fields of view, each from a different coverslip. Size bar is 10  $\mu$ m. E) Images showing CX-G3 labeling in hippocampal neurons before and after mild detergent extraction with 0.01% Triton X-100. Note that Triton removes virtually all of the CX-G3 signal. Size bar is 10  $\mu$ m. F)

Fluorescence excitation spectrum of CX-G3 obtained on the two-photon microscope. G) Images of CX-G3 labeling in glia. Cultured astrocytes were labeled with calcein dye (green) together with CX-G3.

Note that CX-G3 exhibits a perinuclear labeling pattern in astrocytes. Size bar is 10  $\mu$ m.

1. Cortese, G. P.; Zhu, M.; Williams, D.; Heath, S.; Waites, C. L., Parkin Deficiency Reduces Hippocampal Glutamatergic Neurotransmission by Impairing AMPA Receptor Endocytosis. *J Neurosci* **2016**, *36* (48), 12243-12258.



**a**

General Structure

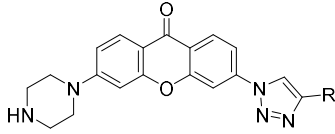

Side Chains

|   | 2          | 3          | 4          | 5          | 6          | 7          | 8          | 9          | 10         | 11         |
|---|------------|------------|------------|------------|------------|------------|------------|------------|------------|------------|
| A | <br>149194 | <br>49154  | <br>303747 | <br>149195 | <br>329131 | <br>240544 | <br>256760 | <br>162022 | <br>133974 | <br>101040 |
| B | <br>76948  | <br>71235  | <br>139540 | <br>112074 | <br>66883  | <br>116227 | <br>69734  | <br>241923 | <br>139650 | <br>249154 |
| C | <br>67113  | <br>165550 | <br>195682 | <br>54527  | <br>119740 | <br>122517 | <br>20015  | <br>29178  | <br>81831  | <br>196376 |
| D | <br>184073 | <br>58109  | <br>138682 | <br>238217 | <br>185461 | <br>14205  | <br>212620 | <br>95309  | <br>285579 | <br>244692 |
| E | <br>186674 | <br>346874 | <br>164243 | <br>229452 | <br>323974 | <br>97656  | <br>78143  | <br>92577  | <br>6184   | <br>5907   |
| F | <br>6293   | <br>4161   | <br>31003  | <br>44247  | <br>1488   | <br>11857  | <br>155908 | <br>27381  | <br>71895  | <br>37181  |
| G | <br>70     | <br>340690 | <br>199970 | <br>3362   | <br>178517 | <br>9768   | <br>14091  | <br>29293  | <br>21104  | <br>26292  |
| H | <br>140492 | <br>100230 | <br>7219   | <br>4250   | <br>83690  | <br>3072   | <br>9474   | <br>30665  | <br>44850  | <br>54080  |

**b**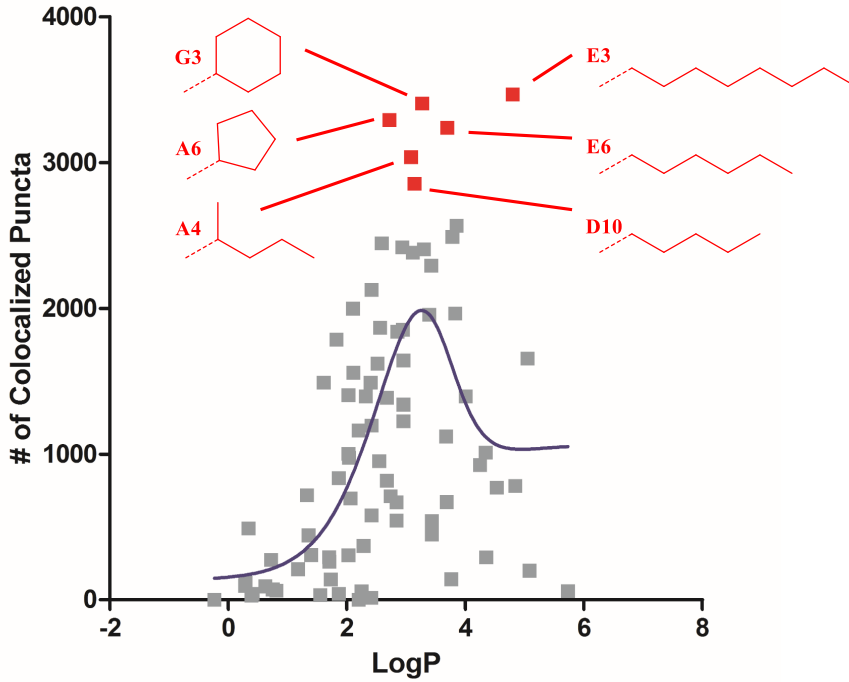**c**

Lysotracker colocalization with GFP-Synapsin

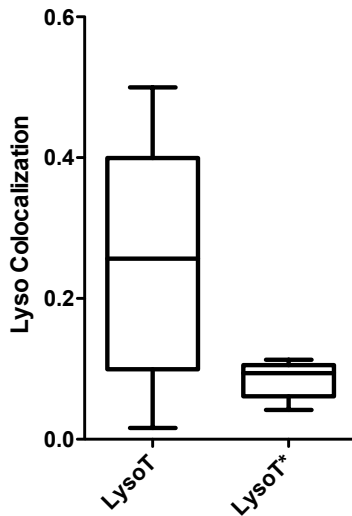

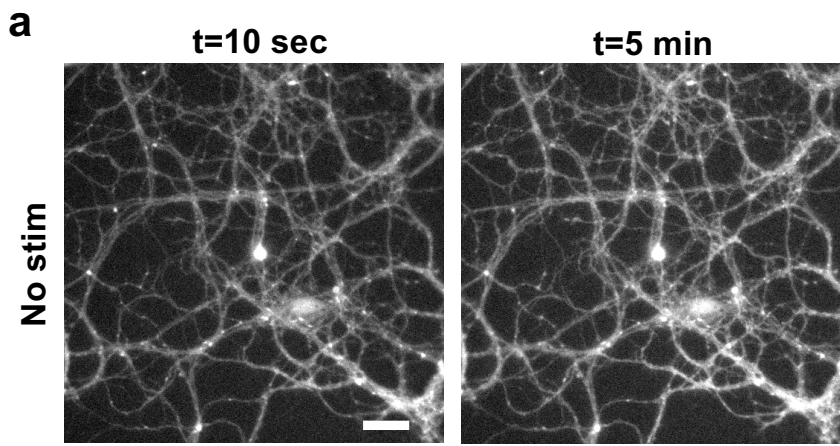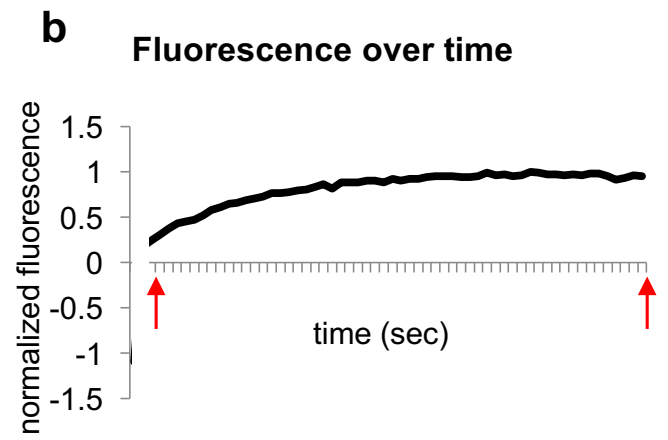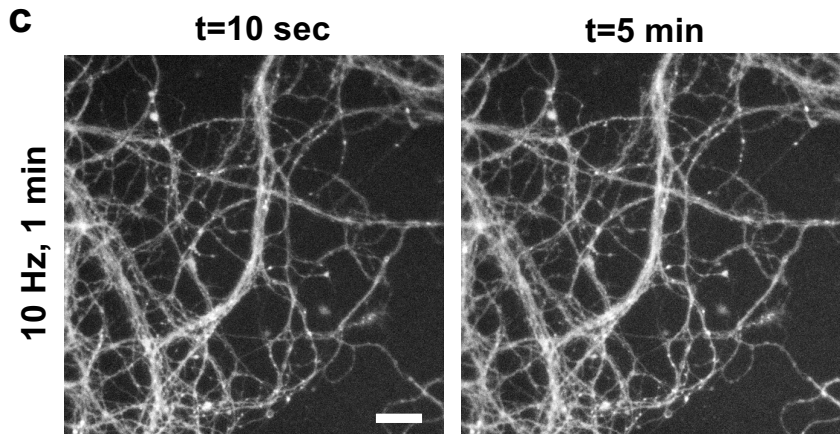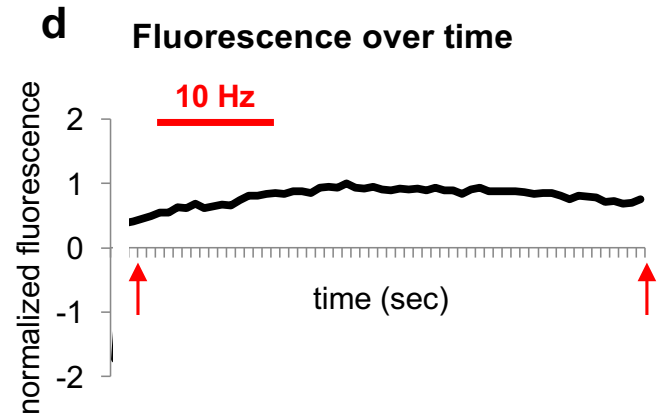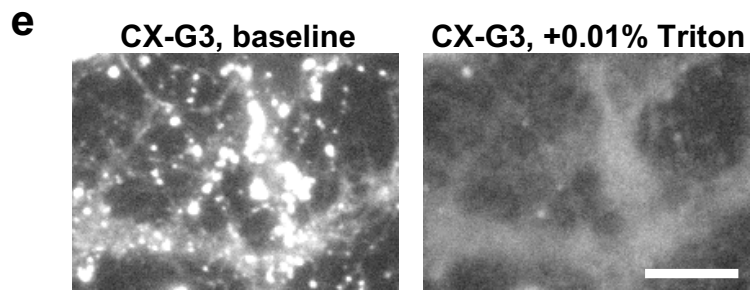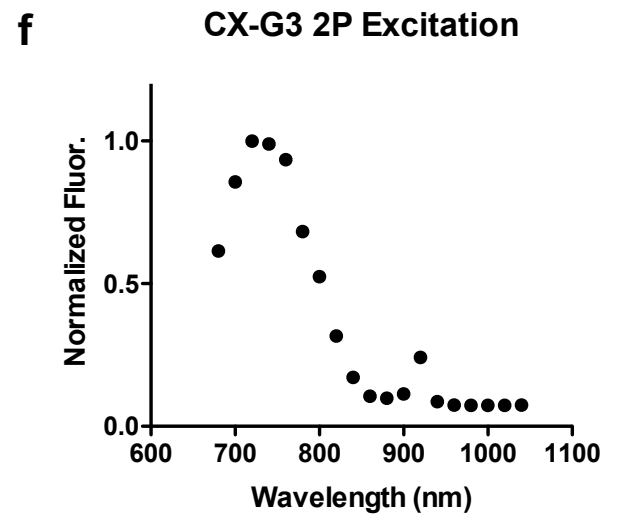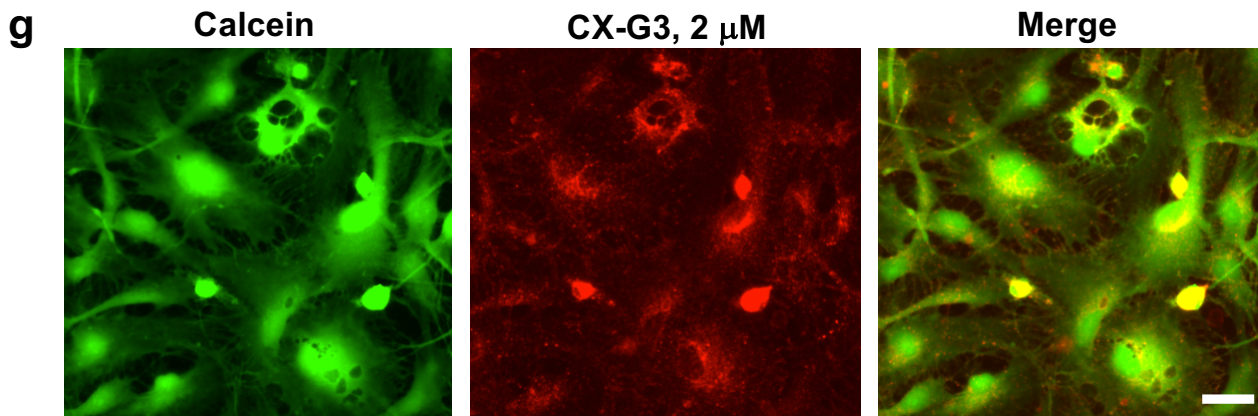

Supplement: NIHMS1779470-supplement-Supplementary_Tables_and_Figures.pdf [file NIHMS1779470-supplement-Supplementary_Tables_and_Figures.pdf]
